# Supplementary material
Source: PubMed Central journal article supplement (PMC4915592)
Supplement: NIHMS793829-supplement-01.pdf [file NIHMS793829-supplement-01.pdf]

**Supplementary Material:**  
**Assessing the Genetic Predisposition of Education on Myopia: a Mendelian Randomization Study**

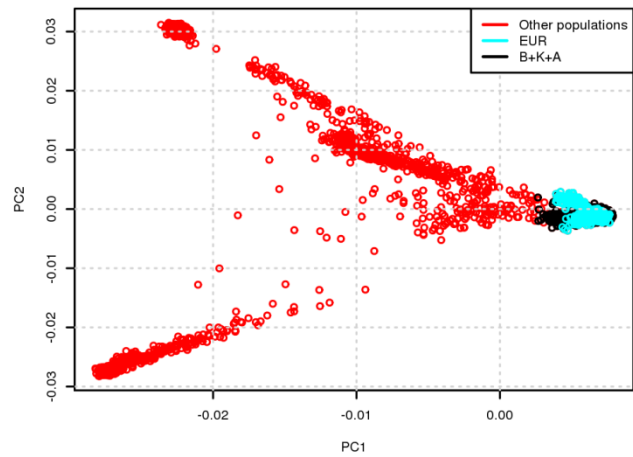

**Supplementary Figure 1.** Principal Component Analysis plot of the BMES, KORA and AREDS together with 1000 Genomes populations.

| <b>Formula: SPHEQ ~ Sex + Age + Height + Smoking + BMI + PGRS + PC1 + PC2 + PC3</b> |                 |                |                    |
|-------------------------------------------------------------------------------------|-----------------|----------------|--------------------|
|                                                                                     | <b>Estimate</b> | <b>s.e.</b>    | <b>Pr(&gt; t )</b> |
| <b>Sex</b>                                                                          | -0.10           | 0.12           | 4.43E-01           |
| <b>Age</b>                                                                          | 0.04            | 0.01           | 1.04E-12           |
| <b>Height</b>                                                                       | -0.57           | 0.69           | 4.12E-01           |
| <b>Smoking</b>                                                                      | 0.21            | 0.15           | 1.57E-01           |
| <b>BMI</b>                                                                          | 0.00            | 0.01           | 8.44E-01           |
| <b>PGRS</b>                                                                         | -3727.00        | 1529.00        | 1.49E-02           |
| <b>PC1</b>                                                                          | 2.27            | 13.40          | 8.65E-01           |
| <b>PC2</b>                                                                          | 0.51            | 4.09           | 9.00E-01           |
| <b>PC3</b>                                                                          | -5.88           | 5.22           | 2.60E-01           |
| <b>Formula: SPHEQ ~ Sex + Age + Height + Smoking + BMI</b>                          |                 |                |                    |
| <b>Sex</b>                                                                          | -0.09           | 0.12           | 4.94E-01           |
| <b>Age</b>                                                                          | 0.04            | 0.01           | 2.68E-12           |
| <b>Height</b>                                                                       | -0.63           | 0.69           | 3.61E-01           |
| <b>Smoking</b>                                                                      | 0.22            | 0.14           | 1.29E-01           |
| <b>BMI</b>                                                                          | 0.00            | 0.01           | 7.98E-01           |
| <b>Formula: Smoking ~ Sex + Age + PGRS + PC1 + PC2 + PC3</b>                        |                 |                |                    |
| <b>Sex</b>                                                                          | 0.39            | 0.14           | 5.85E-03           |
| <b>Age</b>                                                                          | -0.05           | 0.01           | 6.85E-09           |
| <b>PGRS</b>                                                                         | <b>-5322.00</b> | <b>2585.00</b> | <b>3.95E-02</b>    |
| <b>PC1</b>                                                                          | -9.02           | 9.28           | 3.31E-01           |
| <b>PC2</b>                                                                          | -5.24           | 6.39           | 4.12E-01           |
| <b>PC3</b>                                                                          | 5.41            | 7.42           | 4.66E-01           |
| <b>Formula: Height ~ Sex + Age + PGRS + PC1 + PC2 + PC3</b>                         |                 |                |                    |
| <b>Sex</b>                                                                          | 0.13            | 0.00           | 2.00E-16           |
| <b>Age</b>                                                                          | 0.00            | 0.00           | 2.00E-16           |
| <b>PGRS</b>                                                                         | 84.21           | 47.80          | 7.83E-02           |
| <b>PC1</b>                                                                          | -1.20           | 0.42           | 4.36E-03           |
| <b>PC2</b>                                                                          | 0.06            | 0.13           | 6.15E-01           |
| <b>PC3</b>                                                                          | 0.29            | 0.16           | 8.06E-02           |
| <b>Formula: BMI ~ Sex + Age + PGRS + PC1 + PC2 + PC3</b>                            |                 |                |                    |
| <b>Sex</b>                                                                          | -0.25           | 0.20           | 2.25E-01           |
| <b>Age</b>                                                                          | -0.07           | 0.01           | 1.26E-10           |
| <b>PGRS</b>                                                                         | -3725.00        | 3640.00        | 3.06E-01           |
| <b>PC1</b>                                                                          | 23.39           | 31.93          | 4.64E-01           |
| <b>PC2</b>                                                                          | -2.57           | 9.80           | 7.93E-01           |
| <b>PC3</b>                                                                          | 2.21            | 12.50          | 8.60E-01           |

**Supplementary Table 1.** Examination of potential confounders: Height, Smoking and BMI in the BMES cohort. All the estimate are based on linear regressions except for Smoking where we apply a logistic regression.
